# Supplementary material
Source: publisher figshare collection journal article supplement (https://sage.figshare.com/ndownloader/files/17513291)

**Supplemental Figure 1:** Flow diagram of patients included in study analyses.

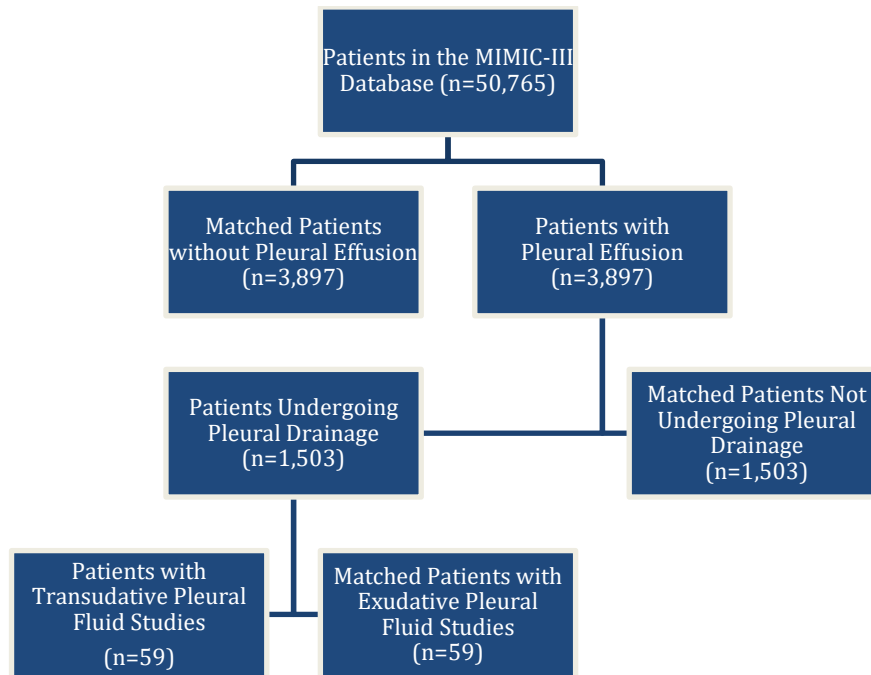

Supplement: Supplementary file 1 [file 17513291]
